# Supplementary material
Source: PubMed Central journal article supplement (PMC7946769)
Supplement: NIHMS1661247-supplement-1.pdf [file NIHMS1661247-supplement-1.pdf]

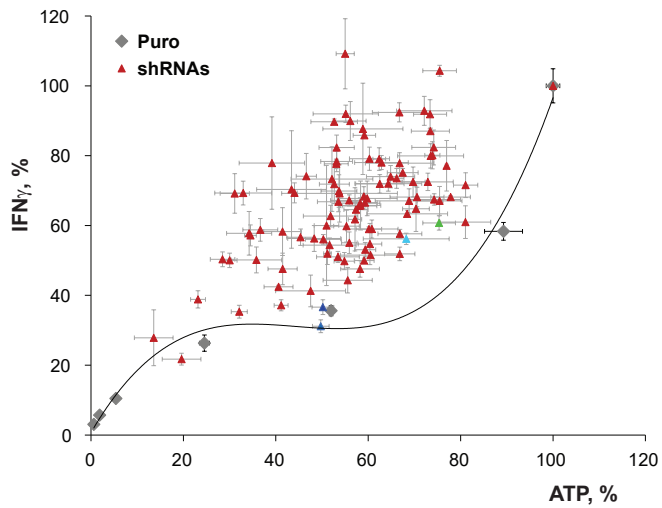

**Supplemental Figure 1.** Dose-dependent effects of puromycin on IFN $\gamma$  and ATP levels (supplement to Fig. 3B). Screening results in comparison with the effect of puromycin in non-transduced Th1\* cells. Puromycin was titrated in the concentration range 0-2  $\mu$ g/ml. Results for T-bet, IL23R, CD160 and ISOC shRNAs are highlighted in different colors. Data were analyzed as described in Fig. 3B and Methods.

| Rank | Gene     | % IFN $\gamma$<br>(normalized per ATP) | S.E.M. |
|------|----------|----------------------------------------|--------|
| 1    | ISOC1    | 29.8                                   | 1.8    |
| 2    | CD160    | 34.9                                   | 2.0    |
| 3    | HSPE1    | 39.4                                   | 1.7    |
| 4    | IER5     | 40.3                                   | 4.4    |
| 5    | RPL39    | 40.9                                   | 3.4    |
| 6    | RPL17    | 43.5                                   | 2.2    |
| 7    | FILIP1L  | 45.5                                   | 0.6    |
| 8    | GAB1     | 45.6                                   | 0.5    |
| 9    | PREP     | 46.1                                   | 2.3    |
| 10   | ZAK      | 46.6                                   | 2.4    |
| 11   | NTN4     | 46.9                                   | 0.2    |
| 12   | IL23R    | 47.0                                   | 1.8    |
| 13   | IL12RB2  | 47.6                                   | 1.5    |
| 14   | CYP2E1   | 48.4                                   | 1.9    |
| 15   | CASP4    | 49.2                                   | 3.0    |
| 16   | TMEM136  | 49.7                                   | 5.4    |
| 17   | LCK      | 50.3                                   | 4.8    |
| 18   | LTB      | 50.8                                   | 2.9    |
| 19   | LRRTM2   | 51.0                                   | 1.5    |
| 20   | TNFSF13B | 51.3                                   | 1.9    |
| 21   | IL18RAP  | 52.2                                   | 1.1    |
| 22   | SASH1    | 53.4                                   | 1.3    |
| 23   | TMEM186  | 53.6                                   | 2.4    |
| 24   | IL1RL1   | 53.7                                   | 0.6    |
| 25   | RORC     | 54.6                                   | 3.6    |
| 26   | PDE4D    | 55.3                                   | 4.2    |
| 27   | T-bet    | 56.0                                   | 1.9    |
| 28   | MTUS2    | 56.7                                   | 8.3    |
| 29   | PARD6A   | 56.7                                   | 2.4    |
| 30   | ZNF444   | 56.9                                   | 16.4   |
| 31   | ADRB2    | 57.2                                   | 4.4    |
| 32   | LRRC16B  | 57.5                                   | 0.9    |
| 33   | CAMK2N1  | 58.9                                   | 6.0    |
| 34   | ZNF133   | 59.1                                   | 2.9    |
| 35   | DAB1     | 59.2                                   | 2.3    |
| 36   | SLC22A15 | 59.5                                   | 4.4    |
| 37   | SEPT4    | 60.0                                   | 0.7    |
| 38   | FZD8     | 60.1                                   | 6.4    |
| 39   | IFI44L   | 60.7                                   | 1.8    |
| 40   | RUNX2    | 60.7                                   | 1.4    |
| 41   | ABCB1    | 60.9                                   | 3.2    |
| 42   | D4S234E  | 61.5                                   | 4.8    |
| 43   | ILF2     | 61.7                                   | 7.3    |
| 44   | TLE4     | 61.8                                   | 4.5    |
| 45   | ATXN7L3  | 61.8                                   | 3.8    |
| 46   | STRAP    | 62.0                                   | 1.5    |
| 47   | YRDC     | 62.0                                   | 1.5    |
| 48   | MESDC1   | 62.1                                   | 2.6    |
| 49   | TMED9    | 62.3                                   | 2.7    |
| 50   | CXCR6    | 62.4                                   | 2.5    |
| 51   | CCL20    | 63.3                                   | 0.3    |
| 52   | KIT      | 64.5                                   | 7.7    |
| 53   | CFH      | 65.2                                   | 4.3    |
| 54   | BCL2L11  | 65.3                                   | 2.0    |
| 55   | ELOVL4   | 65.3                                   | 2.4    |

|    |          |       |      |
|----|----------|-------|------|
| 56 | B3GALTL  | 66.0  | 3.9  |
| 57 | PRF1     | 66.4  | 2.3  |
| 58 | CATSPERB | 66.6  | 2.6  |
| 59 | HOMER1   | 67.1  | 2.9  |
| 60 | PSMB5    | 67.2  | 3.3  |
| 61 | RAP1A    | 67.4  | 5.2  |
| 62 | PPIA     | 68.2  | 1.1  |
| 63 | WNT1     | 68.4  | 3.8  |
| 64 | TPBG     | 69.0  | 8.7  |
| 65 | SIN3A    | 70.3  | 3.7  |
| 66 | IL18R1   | 70.6  | 2.7  |
| 67 | EDN1     | 70.7  | 2.9  |
| 68 | FRMD8    | 70.8  | 1.8  |
| 69 | CLIC4    | 71.1  | 2.9  |
| 70 | RAB12    | 71.4  | 6.7  |
| 71 | GATA     | 71.5  | 7.7  |
| 72 | PPBP     | 71.7  | 2.9  |
| 73 | RIPK2    | 72.1  | 3.0  |
| 74 | LATS2    | 72.3  | 17.3 |
| 75 | ADAM23   | 72.7  | 1.3  |
| 76 | FCER1G   | 73.2  | 6.5  |
| 77 | PTPRF    | 73.3  | 2.7  |
| 78 | CCR2     | 73.3  | 3.2  |
| 79 | CD1C     | 73.5  | 3.6  |
| 80 | C11orf31 | 75.7  | 4.6  |
| 81 | SPCS3    | 76.3  | 3.2  |
| 82 | PDZD2    | 77.0  | 3.4  |
| 83 | ITGB1BP1 | 78.4  | 0.0  |
| 84 | CAMK1D   | 79.5  | 5.1  |
| 85 | c6orf228 | 79.8  | 0.8  |
| 86 | TSPAN15  | 80.1  | 12.0 |
| 87 | WASF1    | 82.9  | 5.1  |
| 88 | PABPC1   | 83.8  | 2.5  |
| 89 | PSMG3    | 84.2  | 0.8  |
| 90 | HNRNPA1  | 84.2  | 3.8  |
| 91 | IL32     | 84.9  | 3.8  |
| 92 | DPP4     | 85.2  | 2.3  |
| 93 | LPAR3    | 86.0  | 14.6 |
| 94 | C8orf83  | 89.1  | 4.4  |
| 95 | PLEKN1   | 94.6  | 7.8  |
| 96 | SLC17A3  | 96.2  | 1.4  |
| 97 | SHC002   | 99.6  | 1.3  |
| 98 | ENPP1    | 101.2 | 9.3  |
| 99 | CYFIP1   | 335.2 | 96.2 |

**Table S1. The results of shRNA screen for regulators of IFN $\gamma$  production in Th1\* cells.** Data are IFN $\gamma$  levels normalized per ATP (as described in Fig. 3B,C and Methods) and expressed as percentages of control values (means and S.E.M., n=3-6 replicate samples).

| Rank | Gene     | ATP,<br>% of<br>control | S.E.M. | IFN $\gamma$ ,<br>% of<br>control | S.E.<br>M. |  |  |  |  |
|------|----------|-------------------------|--------|-----------------------------------|------------|--|--|--|--|
| 1    | D4S234E  | 19.6                    | 4.2    | 21.7                              | 1.7        |  |  |  |  |
| 2    | CYFIP1   | 13.6                    | 4.2    | 27.8                              | 8.0        |  |  |  |  |
| 3    | ISOC1    | 49.7                    | 1.8    | 31.0                              | 1.8        |  |  |  |  |
| 4    | ZAK      | 32.1                    | 1.7    | 35.3                              | 1.8        |  |  |  |  |
| 5    | CD160    | 50.2                    | 2.4    | 36.5                              | 2.1        |  |  |  |  |
| 6    | HSPE1    | 41.1                    | 1.5    | 37.0                              | 1.6        |  |  |  |  |
| 7    | CAMK1D   | 23.2                    | 1.6    | 38.7                              | 2.5        |  |  |  |  |
| 8    | IER5     | 47.5                    | 7.6    | 41.2                              | 4.5        |  |  |  |  |
| 9    | GAB1     | 40.6                    | 3.1    | 42.4                              | 0.4        |  |  |  |  |
| 10   | RPL39    | 55.6                    | 5.3    | 44.3                              | 3.7        |  |  |  |  |
| 11   | RPL17    | 58.2                    | 4.2    | 47.5                              | 2.4        |  |  |  |  |
| 12   | LCK      | 41.5                    | 3.2    | 47.5                              | 4.5        |  |  |  |  |
| 13   | PREP     | 54.8                    | 2.2    | 49.8                              | 2.4        |  |  |  |  |
| 14   | FILIP1L  | 59.1                    | 2.1    | 49.9                              | 0.7        |  |  |  |  |
| 15   | CLIC4    | 30.0                    | 1.6    | 49.9                              | 2.1        |  |  |  |  |
| 16   | SLC22A15 | 35.8                    | 5.5    | 50.1                              | 3.7        |  |  |  |  |
| 17   | SPCS3    | 28.5                    | 2.7    | 50.3                              | 2.1        |  |  |  |  |
| 18   | IL12RB2  | 53.5                    | 4.6    | 50.9                              | 1.6        |  |  |  |  |
| 19   | NTN4     | 60.5                    | 6.5    | 51.5                              | 0.3        |  |  |  |  |
| 20   | IL23R    | 66.8                    | 3.3    | 51.8                              | 1.9        |  |  |  |  |
| 21   | CASP4    | 51.2                    | 0.8    | 51.9                              | 3.1        |  |  |  |  |
| 22   | CYP2E1   | 59.4                    | 2.3    | 53.0                              | 2.1        |  |  |  |  |
| 23   | TNFSF13B | 51.6                    | 5.7    | 54.3                              | 2.0        |  |  |  |  |
| 24   | TMEM136  | 60.4                    | 2.6    | 54.6                              | 5.9        |  |  |  |  |
| 25   | LTB      | 55.9                    | 1.7    | 55.0                              | 3.1        |  |  |  |  |
| 26   | SASH1    | 50.3                    | 3.9    | 56.0                              | 1.4        |  |  |  |  |
| 27   | LRRTM2   | 68.2                    | 9.3    | 56.1                              | 1.6        |  |  |  |  |
| 28   | RORC     | 48.3                    | 5.7    | 56.2                              | 3.7        |  |  |  |  |
| 29   | PARD6A   | 45.3                    | 3.0    | 56.6                              | 2.3        |  |  |  |  |
| 30   | SIN3A    | 34.5                    | 1.3    | 57.1                              | 3.0        |  |  |  |  |
| 31   | IL18RAP  | 66.9                    | 4.8    | 57.6                              | 1.3        |  |  |  |  |
| 32   | GATA     | 34.2                    | 4.9    | 57.7                              | 6.2        |  |  |  |  |
| 33   | ILF2     | 41.5                    | 4.1    | 58.2                              | 6.9        |  |  |  |  |
| 34   | WNT1     | 36.6                    | 3.8    | 58.7                              | 3.2        |  |  |  |  |
| 35   | IL1RL1   | 60.1                    | 2.8    | 58.9                              | 0.7        |  |  |  |  |
| 36   | TMEM186  | 60.8                    | 5.7    | 59.0                              | 2.6        |  |  |  |  |
| 37   | PDE4D    | 55.3                    | 2.8    | 59.8                              | 4.6        |  |  |  |  |
| 38   | ZNF444   | 51.0                    | 2.6    | 60.0                              | 17.2       |  |  |  |  |
| 39   | T-bet    | 75.3                    | 3.5    | 60.7                              | 2.1        |  |  |  |  |
| 40   | ADRB2    | 81.0                    | 5.5    | 60.9                              | 4.7        |  |  |  |  |
| 41   | MTUS2    | 57.1                    | 1.5    | 61.7                              | 9.1        |  |  |  |  |
| 42   | ZNF133   | 51.9                    | 5.9    | 62.7                              | 3.1        |  |  |  |  |
| 43   | LRRRC16B | 68.4                    | 8.7    | 63.3                              | 1.0        |  |  |  |  |
| 44   | DAB1     | 57.4                    | 2.6    | 64.5                              | 2.5        |  |  |  |  |
| 45   | CAMK2N1  | 70.3                    | 2.9    | 64.7                              | 6.5        |  |  |  |  |
| 46   | SEPT4    | 58.1                    | 3.7    | 65.5                              | 0.8        |  |  |  |  |
| 47   | FZD8     | 58.3                    | 4.4    | 65.7                              | 7.0        |  |  |  |  |
| 48   | RUNX2    | 58.3                    | 4.3    | 66.4                              | 1.5        |  |  |  |  |
| 49   | IFI44L   | 59.3                    | 2.7    | 66.5                              | 2.0        |  |  |  |  |
| 50   | TMED9    | 53.6                    | 4.5    | 66.8                              | 2.9        |  |  |  |  |
| 51   | ABCB1    | 68.9                    | 7.3    | 67.0                              | 3.5        |  |  |  |  |
| 52   | ATXN7L3  | 75.4                    | 4.8    | 67.0                              | 4.1        |  |  |  |  |
| 53   | YRDC     | 55.9                    | 4.0    | 67.2                              | 1.6        |  |  |  |  |
| 54   | STRAP    | 74.3                    | 5.7    | 67.4                              | 1.6        |  |  |  |  |
| 55   | TLE4     | 59.8                    | 6.5    | 67.7                              | 5.0        |  |  |  |  |
| 56   | MESDC1   | 70.6                    | 5.8    | 68.1                              | 2.8        |  |  |  |  |
| 57   | CCL20    | 77.8                    | 4.3    | 68.2                              | 0.3        |  |  |  |  |
| 58   | CXCR6    | 59.1                    | 0.3    | 68.3                              | 2.8        |  |  |  |  |
| 59   | PLEKN1   | 31.1                    | 3.2    | 69.2                              | 5.7        |  |  |  |  |
| 60   | KIT      | 53.8                    | 12.5   | 69.2                              | 8.2        |  |  |  |  |
| 61   | C8orf83  | 32.9                    | 6.2    | 69.3                              | 3.4        |  |  |  |  |
| 62   | EDN1     | 44.0                    | 0.6    | 69.3                              | 2.9        |  |  |  |  |
| 63   | CFH      | 53.7                    | 3.9    | 69.8                              | 4.7        |  |  |  |  |
| 64   | LATS2    | 43.4                    | 7.5    | 70.3                              | 16.8       |  |  |  |  |
| 65   | PSMB5    | 81.1                    | 2.6    | 71.5                              | 3.6        |  |  |  |  |
| 66   | RAP1A    | 52.7                    | 3.2    | 71.8                              | 5.6        |  |  |  |  |
| 67   | ELOVL4   | 62.5                    | 5.2    | 71.9                              | 2.6        |  |  |  |  |
| 68   | BCL2L11  | 64.3                    | 7.2    | 72.0                              | 2.2        |  |  |  |  |
| 69   | B3GALTL  | 69.7                    | 2.6    | 72.4                              | 4.3        |  |  |  |  |
| 70   | PRF1     | 72.9                    | 5.5    | 72.5                              | 2.5        |  |  |  |  |
| 71   | TPBG     | 52.2                    | 8.8    | 73.3                              | 9.3        |  |  |  |  |
| 72   | CATSPERB | 66.2                    | 1.6    | 73.5                              | 2.8        |  |  |  |  |
| 73   | HOMER1   | 64.8                    | 5.2    | 74.0                              | 3.2        |  |  |  |  |
| 74   | FCER1G   | 46.6                    | 2.2    | 74.1                              | 6.5        |  |  |  |  |
| 75   | PPIA     | 67.5                    | 3.3    | 75.1                              | 1.2        |  |  |  |  |
| 76   | RAB12    | 77.0                    | 0.3    | 77.1                              | 7.2        |  |  |  |  |
| 77   | ADAM23   | 53.1                    | 2.6    | 77.6                              | 1.4        |  |  |  |  |
| 78   | IL18R1   | 66.8                    | 7.4    | 77.8                              | 3.0        |  |  |  |  |
| 79   | LPAR3    | 39.2                    | 7.1    | 77.9                              | 13.3       |  |  |  |  |
| 80   | FRMD8    | 62.9                    | 5.8    | 78.0                              | 2.0        |  |  |  |  |
| 81   | PTPRF    | 53.2                    | 3.4    | 78.3                              | 2.9        |  |  |  |  |
| 82   | PPBP     | 62.4                    | 1.4    | 79.0                              | 3.2        |  |  |  |  |
| 83   | RIPK2    | 60.3                    | 4.3    | 79.1                              | 3.3        |  |  |  |  |
| 84   | CCR2     | 73.5                    | 7.1    | 79.9                              | 3.5        |  |  |  |  |
| 85   | CD1C     | 73.9                    | 1.6    | 80.1                              | 3.9        |  |  |  |  |
| 86   | PDZD2    | 53.2                    | 3.8    | 82.3                              | 3.6        |  |  |  |  |
| 87   | C11orf31 | 74.2                    | 4.7    | 82.4                              | 5.0        |  |  |  |  |
| 88   | ITGB1BP1 | 59.2                    | 2.4    | 85.8                              | 0.0        |  |  |  |  |
| 89   | c6orf228 | 73.4                    | 4.1    | 87.0                              | 0.9        |  |  |  |  |
| 90   | TSPAN15  | 58.8                    | 8.7    | 87.7                              | 13.1       |  |  |  |  |
| 91   | PSMG3    | 52.6                    | 5.0    | 89.7                              | 0.8        |  |  |  |  |
| 92   | WASF1    | 56.1                    | 3.4    | 89.9                              | 5.6        |  |  |  |  |
| 93   | HNRNPA1  | 73.4                    | 3.6    | 91.9                              | 4.2        |  |  |  |  |
| 94   | DPP4     | 55.1                    | 7.1    | 92.0                              | 2.5        |  |  |  |  |
| 95   | PABPC1   | 66.7                    | 5.8    | 92.4                              | 2.7        |  |  |  |  |
| 96   | IL32     | 72.1                    | 6.0    | 92.8                              | 4.2        |  |  |  |  |
| 97   | SHC002   | 100.0                   | 1.5    | 100.0                             | 1.3        |  |  |  |  |
| 98   | SLC17A3  | 75.5                    | 3.6    | 104.3                             | 1.6        |  |  |  |  |
| 99   | ENPP1    | 55.0                    | 2.0    | 109.2                             | 10.1       |  |  |  |  |

**Table S2. The results of shRNA screen for regulators of IFN $\gamma$  production in Th1\* cells.** Data are IFN $\gamma$  and ATP levels (also shown in **Fig. 3A**) and expressed as percentages of control values (means and S.E.M., n=3-6 replicate samples).

***CD160*****TRC ID:**

TRCN0000057578

**1**

TRCN0000057579

**2**

TRCN0000057580

**3**

TRCN0000057581

**4**

TRCN0000057582

**5****OLIG\_SEQ**

CCGGCCCAGCTTCATCTAAATACTTCTCGAGAAGTATTTAGATGAAGCTGGGTTTTTG

CCGGCGCGACTAAACTTAATCTGTACTCGAGTACAGATTAAGTTTAGTCGCGTTTTTG

CCGGCTACACAGTGACGGGATTGAACTCGAGTTCAATCCCCTCACTGTGTAGTTTTTG

CCGGTCTCAGTTGATGTTACCATACTCGAGTATGGTGAACATCAACTGAGTTTTTG

CCGGCTGTACTGTATGGCATAAGAACTCGAGTTCTTATGCCATACAGTACAGTTTTTG

***ISOC1*****TRC ID:**

TRCN0000140596

**1**

TRCN0000140230

**2**

TRCN0000140633

**3**

TRCN0000141622

**4****OLIG\_SEQ**

CCGGGAAGCGGCATTAGCAGAGATTCTCGAGAATCTCTGCTAATGCCGCTTCTTTTTTG

CCGGGTTCGAGGTTACATTGTTGCTCTCGAGAGCAACAATGTGAACCTCGACTTTTTTG

CCGGGCTGTGATATGCAGGAAAGGTCTCGAGACCTTTCCTGCATATCACAGCTTTTTTG

CCGGCAGACCAGCCATCAAGTATTTCTCGAGAAATACTTGATGGCTGGTCTGTTTTTG

**TABLE S3. TRC shRNA library clone IDs and sequences corresponding to ISOC1 and CD160 shRNA used in the study.**
